# Supplementary material for: Late mortality after sepsis
Source: HighWire-hosted journal article supplement (doi:10.1136/bmj.i2735), 2016-05-17
Supplement: bmj.i2735.pdf [file bmj.i2735.pdf]

# 脓毒症后的晚期病死率

脓毒症的下游效应包括无法解释的晚期死亡

## Late mortality after sepsis

Downstream effects of sepsis include unexplained late deaths

来源:BMJ 2016;353:i2735 doi: 10.1136/bmj.i2735

最近发布了一系列新的脓毒症<sup>1</sup> (sepsis)定义及早期诊断的简要指南,英国国家健康与临床优选研究所(NICE)的相关指南也即将推出<sup>2</sup>。脓毒症是人体应对一种严重感染时的极端表现——在某种程度上是一种适应及保护,但与此同时存在着潜在的不适应甚至危及生命。因此早期诊断及管理也就自然而然地成为了焦点。然而,在这方面我们做得并不是很好,2015年英国国家的患者结局和死亡机密调查(UK National Confidential Enquiry into Patient Outcome and Death)报告中也强调了这一点<sup>3</sup>。Prescott及其同事在一篇相关链接文章中(doi:10.1136/bmj.i2375)指出,罹患过一段时间脓毒症的存活患者在很长一段时间内的额外死亡风险都会显著升高<sup>4</sup>。过去,重症监护病房的工作人员在把患者转入普通病房后会有一种出色完成工作的满足感,从某种程度上认为患者的病程已经结束并开始进入恢复期。从那时起很多发表的文章就质疑这种一厢情愿假设。对相当数量的患者而言,离开重症监护病房并不意味着病程的终结,反而恰恰是某种未知或难以解释的病程的开始。许

多研究描述了患者及其家属所遭遇的困境。这些困扰包括肌肉及肌力衰减<sup>5</sup>、认知障碍<sup>6</sup>、焦虑和抑郁及创伤后紧张性精神障碍<sup>7</sup>。对于患者的家属而言,随之而来的是医疗及财务上的双重挑战<sup>8,9</sup>。随着NICE针对危重病后期康复指南的发布,英国政府至少在宏观上已经致力于解决这一问题<sup>10</sup>。

Prescott及其同事对北美地区颇具规模的退休人群进行了细致的研究,以探究脓毒症是否会给生存者造成额外的死亡风险负担。作者们应用倾向评分法,在校正了一些明显的干扰因素后,对不同人群进行了一系列的比较。对于我们很多人而言,基于倾向评分法的分析结果好像更能增强信心。大致说来,这些方法就是在难以进行试验的情况下重构适宜条件(匹配良好的组别),并得出公正的试验结果。研究者们应用倾向评分法对有合理背景特征的各对照组进行了校正,其中包括:非住院患者、非感染性炎症住院患者和非脓毒症感染住院患者。研究者们确认了在较长恢复期内(至少持续2年)与脓毒症相关的额外病死率的附加负担。

虽然总会有一些无法确定的干扰因素存在,并可能造成研究结果失真,但也很难再找到其他替代或更为严谨的方法来解决这一科研中的困扰。当然,还有一些重要的问题尚待解答:这一突出的晚期死亡风险是否涉及所有65岁以下的患者?病理

Stephen J Brett  
consultant in intensive  
care medicine

Centre for  
Perioperative  
Medicine and Critical  
Care Research,  
Imperial College  
Healthcare NHS  
Trust, Hammersmith  
Hospital, London  
W12 0HS, UK

Correspondence to:  
stephen.  
brett@imperial.ac.uk

刘雨译  
美国纽约西奈山  
医院肾内科

机制是什么？真正的致死原因是什么？最后，做些什么可以减少这一额外风险？文章中还包含了一些耐人寻味的关于“进入终末期”的数据，这些数据主要涉及与感染性疾病相关的诊断；脓毒症可以再现于那些因既往危重症而体质受损的患者<sup>11</sup>。

我们中的一些人看到过很多危重病后随诊的患者，往往对很多个体患者能够如此地恢复活力而印象深刻。但是，我们也同样目睹了许多以往健壮的患者变得大不如前，他们已经没有必需的体力去抵御任何进一步严重威胁他们健康的疾病。此类患者的日常生活难以自理，生活质量下降，并且不大可能恢复到病前的身体状态。文章作者推测加速的心血管病理改变可能是造成这种情况的主因。这一推测是相当合理的，因为心血管病变本身就可以是持续感染（可能导致免疫抑制）的一种潜在临床表现<sup>12</sup>。

对于这些新信息，我们应该做些什么呢？也许我们需要对初级和二级医疗照护的专业技术人员给予相关的教育，同时还需要对患者以及更广泛的公众给予教育，使他们认识到脓毒症的这些下游效应，就像我们目前为认知脓毒症临床表现及早期治疗所做的努力一样(www.sepsistrust.org)。Prescott及其同事通过应用一个并非预先为此目的而设计的系统，敏锐地认识到了这一问题。随着一些“大数据”启动项目的发展，急性病与未来社区医疗保健间的信息数据连接变为可能。我们也许在不久的将来就有能力为危重疾病，例如脓毒症，建立预期注册档案，届时我们将对此类疾病的长期风险了解得更为透彻。

#### 参考文献

1 Shankar-Hari M, Phillips GS, Levy ML, et al. Sepsis Definitions Task Force. Developing a New Definition and Assessing New

- Clinical Criteria for Septic Shock: For the Third International Consensus Definitions for Sepsis and Septic Shock (Sepsis-3). *JAMA* 2016;315:775-87. doi:10.1001/jama.2016.0289 pmid:26903336.
- 2 National Institute for Health and Care Excellence. Sepsis: the recognition, diagnosis and management of sepsis. 2016. <https://www.nice.org.uk/guidance/indevelopment/gidcgwave0686/documents>.
- 3 National Confidential Enquiry into Patient Outcome and Death. Just say sepsis! A review of the process of care received by patients with sepsis. 2015. [http://www.ncepod.org.uk/2015report2/downloads/JustSaySepsis\\_FullReport.pdf](http://www.ncepod.org.uk/2015report2/downloads/JustSaySepsis_FullReport.pdf).
- 4 Prescott HC, Osterholzer JJ, Langa KM, Angus DC, Iwashyna TJ. Late mortality after sepsis: propensity matched cohort study. *BMJ* 2016;353:i2375.
- 5 Puthuchery ZA, Rawal J, McPhail M, et al. Acute skeletal muscle wasting in critical illness. *JAMA* 2013;310:1591-600. doi:10.1001/jama.2013.278481 pmid:24108501.
- 6 Sukantarat KT, Burgess PW, Williamson RC, Brett SJ. Prolonged cognitive dysfunction in survivors of critical illness. *Anaesthesia* 2005;60:847-53. doi:10.1111/j.1365-2044.2005.04148.x pmid:16115244.
- 7 Wade DM, Howell DC, Weinman JA, et al. Investigating risk factors for psychological morbidity three months after intensive care: a prospective cohort study. *Crit Care* 2012;16:R192. doi:10.1186/cc11677 pmid:23068129.
- 8 Griffiths J, Hatch RA, Bishop J, et al. An exploration of social and economic outcome and associated health-related quality of life after critical illness in general intensive care unit survivors: a 12-month follow-up study. *Crit Care* 2013;17:R100. doi:10.1186/cc12745 pmid:23714692.
- 9 Cameron JI, Chu LM, Matte A, et al. RECOVER Program Investigators (Phase 1: towards RECOVER) and the Canadian Critical Care Trials Group. One-Year Outcomes in Caregivers of Critically Ill Patients. *N Engl J Med* 2016;374:1831-41. doi:10.1056/NEJMoa1511160 pmid:27168433.
- 10 National Institute for Health and Care Excellence. Rehabilitation after critical illness in adults. 2009. <https://www.nice.org.uk/guidance/cg83>.
- 11 Shen HN, Lu CL, Yang HH. Risk of recurrence after surviving severe sepsis: a matched cohort study. *Crit Care Med* 2016; [Epub ahead of print]. doi:10.1097/CCM.0000000000001824 pmid:27120256.
- 12 Griffith DM, Lewis S, Rossi AG, et al. RECOVER Investigators. Systemic inflammation after critical illness: relationship with physical recovery and exploration of potential mechanisms. *Thorax* 2016;thoraxjnl-2015-208114.pmid:27118812.

BMJ takes no responsibility for the accuracy of the translation from the published English language original and is not liable for any errors that may occur.

# BMJ
